# Supplementary material for: Impaired Platelet Aggregation and Rebalanced Hemostasis in Patients with Chronic Hepatitis C Virus Infection
Source: PubMed Central journal article supplement (PMC5454929; doi:10.3390/ijms18051016), 2017-05-08
Supplement: ijms-18-01016-s001.pdf [file ijms-18-01016-s001.pdf]

**Supplementary table 1**

|                                                | Normal range                      | HCV infected with cirrhosis (n=31) | HCV infected with no or mild fibrosis (n=43) | p-value |
|------------------------------------------------|-----------------------------------|------------------------------------|----------------------------------------------|---------|
| <b>Standard coagulation tests</b>              |                                   |                                    |                                              |         |
| Platelet count, median (IQR)                   | 145-390 × 10 <sup>9</sup> cells/l | 139 (112-187)                      | 232 (184-267)                                | <0.001  |
| Coagulation factors II-VII-X, median (IQR)     | >0.60 arb.units/l                 | 0.77 (0.6-0.87)                    | 0.88 (0.76-1.03)                             | 0.006   |
| Antithrombin, median (IQR)                     | 0.83-1.15×10 <sup>3</sup> IU/l    | 0.86 (0.7-0.92)                    | 1.01 (0.95-1.11)                             | <0.001  |
| APTT, median (IQR)                             | 25-37 s                           | 28 (26-30)                         | 28 (27-30)                                   | 0.974   |
| Fibrinogen, median (IQR)                       | 5.3-10.3 µmol/l                   | 8.8 (7.6-10.3)                     | 8.1 (7.1-9.5)                                | 0.228   |
| <b>Whole blood functional hemostasis tests</b> |                                   |                                    |                                              |         |
| R, median (IQR)                                | 4-9 min                           | 6.8 (5.8-7.9)                      | 6.4 (5.5-7.5)                                | 0.135   |
| Angle, median (IQR)                            | 55-78 degrees                     | 65 (60-68)                         | 67 (64-69)                                   | 0.075   |
| MA, median (IQR)                               | 51-69 mm                          | 59 (54-61)                         | 61 (57-63)                                   | 0.110   |
| Ly30, %, median (IQR)                          | 0-4%                              | 0.9 (0.0-2.6)                      | 1.4 (0.2-3.2)                                | 0.281   |

Data are presented as median (IQR) with p values reflecting differences between CHC-infected patients with no or mild fibrosis and HCV patients infected with cirrhosis. The two groups were compared Mann-Whitney U test. The indicated p-value represents comparison between HCV infected patients with no or mild fibrosis and patients with cirrhosis; arb.units, arbitrary units; CHC, Chronic Hepatitis C; FEU, Fibrinogen equivalent units; U, Units
